# Supplementary material for: Pathways of PFOA to the Arctic: variabilities and contributions of oceanic currents and atmospheric transport and chemistry sources
Source: Copernicus journal article supplement (doi:10.5194/acp-10-9965-2010), 2010-10-20
Supplement: Supplementary file 1 [file acp-10-9965-2010-supplement.zip]

Supplement to  
Pathways of PFOA to the Arctic: Variabilities and Contributions of Oceanic Currents and  
Atmospheric Transport and Chemistry Sources  
by I. Stemmler and G. Lammel:

Figure S1

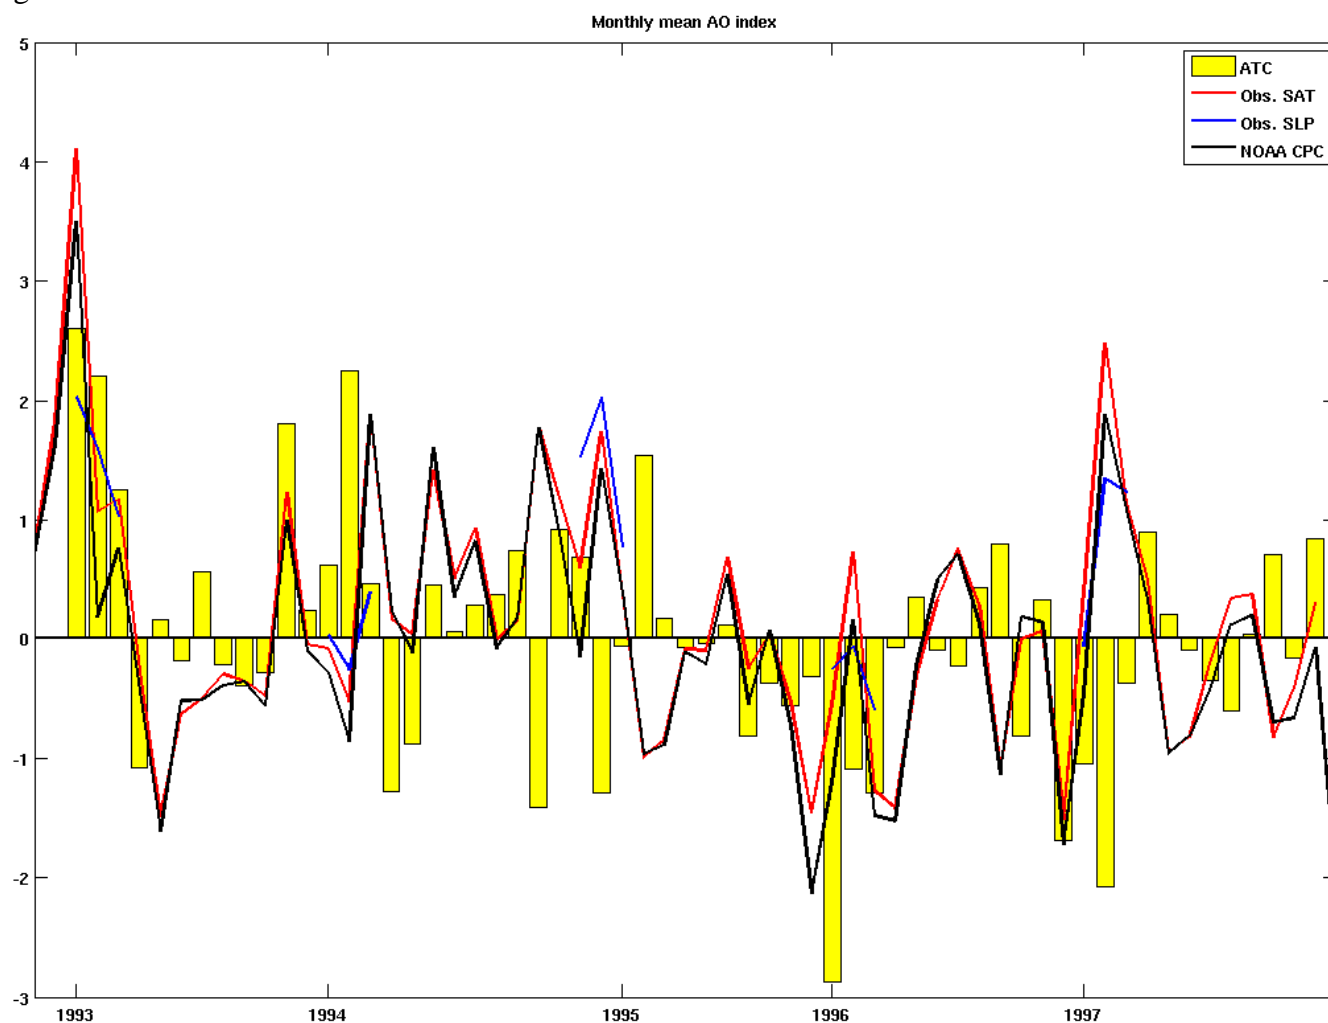

Fig. S1: Arctic oscillation indices (AOI) 1993-1998, calculated from monthly mean sea level pressures of the ATC experiment (ATC, yellow), derived from NCEP/NCAR reanalysis surface atmospheric temperatures (Obs. SAT) and sea level pressures (Obs. SLP) (Thompson & Wallace, 2000, downloaded from [http://www.atmos.colostate.edu/ao/Data/ao\\_index.html](http://www.atmos.colostate.edu/ao/Data/ao_index.html)), and AOI from NOAA CPC (downloaded from [http://www.cpc.ncep.noaa.gov/products/precip/CWlink/daily\\_ao\\_index/ao.shtml](http://www.cpc.ncep.noaa.gov/products/precip/CWlink/daily_ao_index/ao.shtml)).
